# Supplementary material for: LTR retrotransposon landscape in Medicago truncatula: more rapid removal than in rice
Source: Springer Nature journal article supplement (doi:10.1186/1471-2164-9-382), 2008-01-01
Supplement: Additional file 2 [file 1471-2164-9-382-s2.pdf]

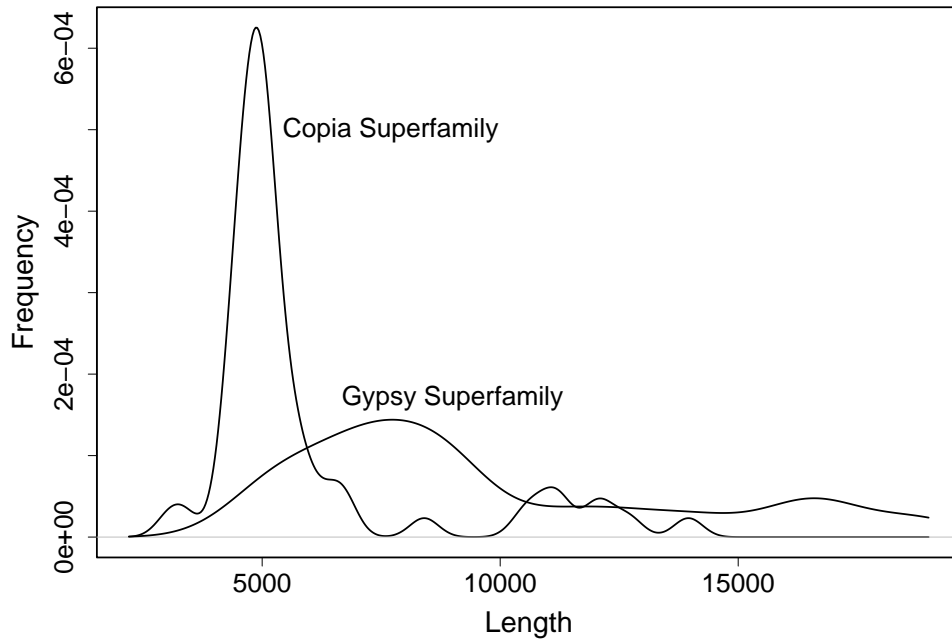

(a) The distribution of full length.

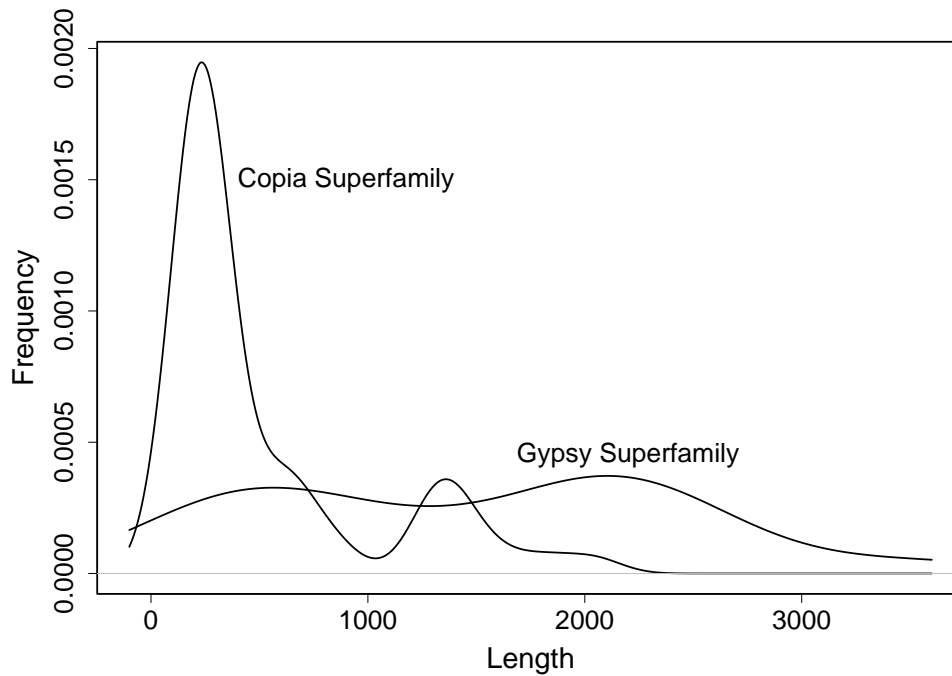

(b) The distribution of the length of LTR.

Figure S2.1: The distribution of the length of full-length element and LTR in Copia and Gypsy superfamilies.
